# Supplementary material for: Phase behavior, rheology, and release from liquid crystalline phases containing combinations of glycerol monooleate, glyceryl monooleyl ether, propylene glycol, and water
Source: Royal Society of Chemistry journal article supplement (doi:10.1039/c7ra04249c), 2017-01-01
Supplement: c7ra04249c1.pdf [file c7ra04249c1.pdf]

1 Supplementary data

2

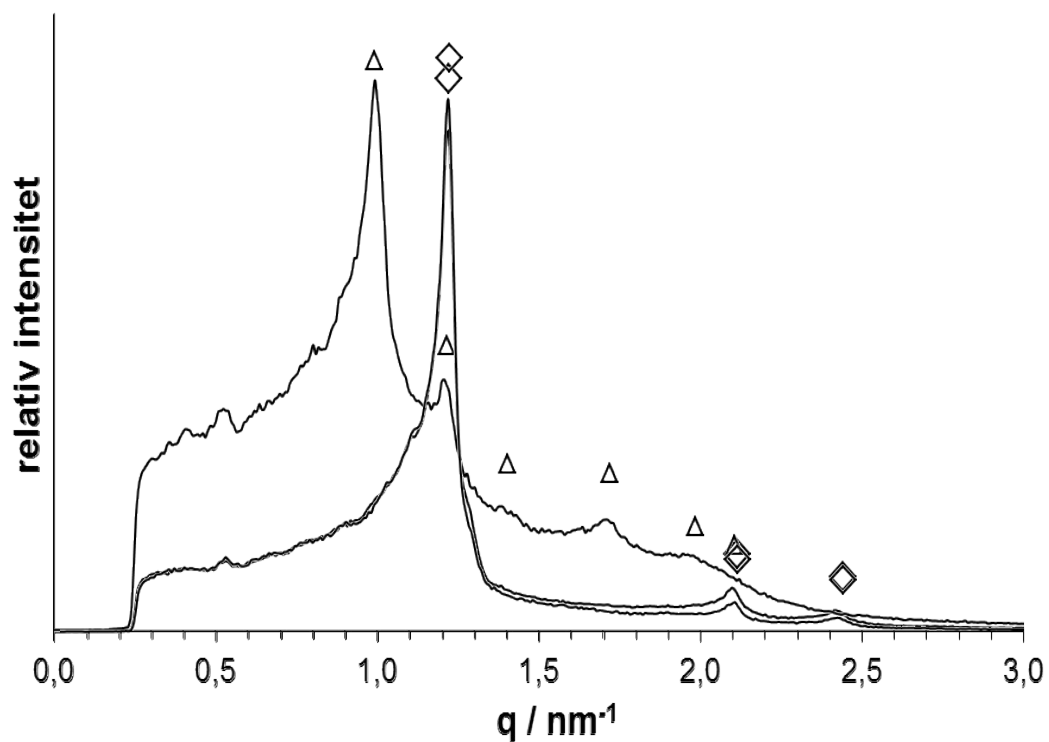

3

4 Figure 1: SAXD peaks showing the reversed hexagonal phase (diamond) and the cubic phase in  
5 maximally swelled state (triangle). The second layer of the reversed hexagonal phase results is from a  
6 sample (GME/PG/W) that was originally cubic but changed phase during the drug release experiment.

7

8

9

10

11

12

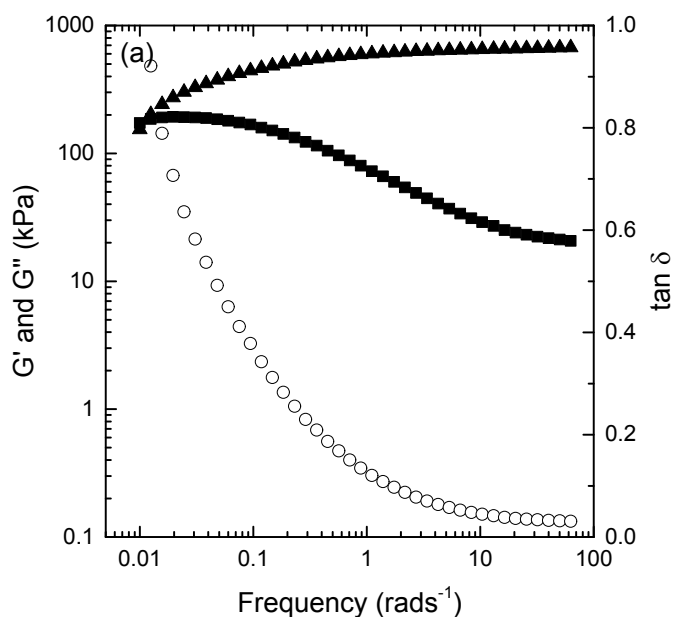

13

14 Figure 2:  $G'$  (triangles),  $G''$  (squares), and  $\tan \delta$  (open circles) as a function of frequency of  
 15 cubic phase composed of 80:20 (wt %) GMO/PG/W at a strain of 0.01% and  $T = 20^\circ\text{C}$ .

16

17

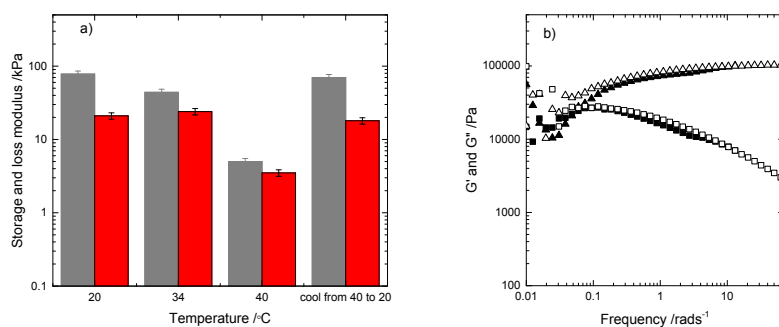

18

19 Figure 3: Reversibility of structure for the GME/GMO/water mix at 16:64:20 at a) different  
 20 temperatures  $G'$  (grey) and  $G''$  (red) at 20 minutes of rest at  $T = 20, 34$  and  $40$  and finally when the  
 21 temperature is cooled from  $40$  back to  $20^\circ\text{C}$  and b) frequency sweep at  $T=20^\circ\text{C}$  prior (open symbols)  
 22 to keeping the sample at  $34$  and  $40^\circ\text{C}$  for 30 minutes each and back to  $20^\circ\text{C}$  (filled symbols) where  $G'$   
 23 is represented by triangles and  $G''$  by squares. The frequency sweep is done with a strain of 0.1%.

24
